# Supplementary material for: A unique hydrogen bonding network in the crystal structure of 3a,6a-diphenylglycoluril
Source: Royal Society of Chemistry journal article supplement (doi:10.1039/b313267f), 2003-01-01
Supplement: tables.doc [file tables.doc]

Table 1. Crystal data and structure refinement for Compound **2**.

Identification code um316s

Empirical formula C20 H22 N4 O2

Formula weight 350.42

Temperature 300(2) K

Wavelength 0.71073 Å

Crystal system Triclinic

Space group P-1

Unit cell dimensions a = 8.7863(6) Å = 96.4150(10)°.

b = 8.9879(6) Å = 90.7830(10)°.

c = 12.6434(9) Å  = 108.9400(10)°.

Volume 937.16(11) Å3

Z 2

Density (calculated) 1.242 Mg/m3

Absorption coefficient 0.083 mm-1

F(000) 372

Crystal size 0.32 x 0.25 x 0.24 mm3

Theta range for data collection 2.41 to 25.00°.

Index ranges -10<=h<=10, -10<=k<=9, -9<=l<=15

Reflections collected 5023

Independent reflections 3278 [R(int) = 0.0110]

Completeness to theta = 25.00° 99.1 %

Absorption correction Empirical

Max. and min. transmission 1.000000 and 0.804350

Refinement method Full-matrix least-squares on F2

Data / restraints / parameters 3278 / 0 / 235

Goodness-of-fit on F2 1.002

Final R indices [I>2sigma(I)] R1 = 0.0510, wR2 = 0.1485

R indices (all data) R1 = 0.0644, wR2 = 0.1556

Largest diff. peak and hole 0.199 and -0.228 e.Å-3

Table 2. Atomic coordinates ( x 104) and equivalent isotropic displacement parameters (Å2x 103)

for um316s. U(eq) is defined as one third of the trace of the orthogonalized Uij tensor.

________________________________________________________________________________

x y z U(eq)

________________________________________________________________________________

N(4) 2728(2) 1186(2) 6367(1) 53(1)

O(2) 878(2) -1286(2) 6420(1) 73(1)

N(3) 2594(2) 69(2) 7855(1) 52(1)

N(1) 3673(2) 2567(2) 9000(1) 56(1)

C(15) 5324(2) 3363(2) 6670(1) 43(1)

C(1) 3935(2) 1551(2) 8103(1) 42(1)

C(2) 3742(2) 2464(2) 7126(1) 41(1)

C(9) 5556(2) 1289(2) 8194(1) 47(1)

N(2) 2913(2) 3506(2) 7609(1) 57(1)

C(7) 1951(2) -122(2) 6843(2) 50(1)

O(1) 2465(2) 4487(2) 9294(2) 92(1)

C(20) 6007(2) 2645(2) 5875(2) 57(1)

C(4) 2959(2) 3602(2) 8688(2) 60(1)

C(10) 6860(2) 2452(3) 8761(2) 60(1)

C(16) 6191(2) 4889(2) 7115(2) 56(1)

C(17) 7701(3) 5662(2) 6775(2) 67(1)

C(14) 5805(3) -4(3) 7624(2) 65(1)

C(18) 8360(3) 4949(3) 5993(2) 70(1)

C(19) 7524(3) 3434(3) 5542(2) 73(1)

C(6) 2104(3) -1170(3) 8540(2) 78(1)

C(8) 2124(3) 1423(3) 5348(2) 88(1)

C(12) 8612(4) 1022(5) 8177(3) 98(1)

C(11) 8376(3) 2311(4) 8748(2) 82(1)

C(13) 7341(4) -132(4) 7611(2) 88(1)

C(5) 2355(4) 4567(3) 7043(3) 100(1)

C(3) 3705(3) 2276(4) 10104(2) 89(1)

________________________________________________________________________________

Table 3. Bond lengths [Å] and angles [°] for um316s.

_____________________________________________________

N(4)-C(7) 1.363(3)

N(4)-C(2) 1.449(2)

N(4)-C(8) 1.451(3)

O(2)-C(7) 1.221(2)

N(3)-C(7) 1.361(2)

N(3)-C(1) 1.463(2)

N(3)-C(6) 1.446(3)

N(1)-C(4) 1.367(3)

N(1)-C(1) 1.444(2)

N(1)-C(3) 1.450(3)

C(15)-C(16) 1.385(3)

C(15)-C(20) 1.382(3)

C(15)-C(2) 1.521(2)

C(1)-C(9) 1.523(2)

C(1)-C(2) 1.593(2)

C(2)-N(2) 1.452(2)

C(9)-C(14) 1.379(3)

C(9)-C(10) 1.397(3)

N(2)-C(4) 1.356(3)

N(2)-C(5) 1.452(3)

O(1)-C(4) 1.227(2)

C(20)-C(19) 1.387(3)

C(10)-C(11) 1.379(3)

C(16)-C(17) 1.382(3)

C(17)-C(18) 1.356(3)

C(14)-C(13) 1.391(3)

C(18)-C(19) 1.373(3)

C(12)-C(13) 1.376(4)

C(12)-C(11) 1.371(4)

C(7)-N(4)-C(2) 111.89(15)

C(7)-N(4)-C(8) 120.71(17)

C(2)-N(4)-C(8) 123.61(17)

C(7)-N(3)-C(1) 112.59(15)

C(7)-N(3)-C(6) 122.13(17)

C(1)-N(3)-C(6) 124.87(16)

C(4)-N(1)-C(1) 111.77(16)

C(4)-N(1)-C(3) 120.90(18)

C(1)-N(1)-C(3) 125.15(18)

C(16)-C(15)-C(20) 118.09(17)

C(16)-C(15)-C(2) 120.10(16)

C(20)-C(15)-C(2) 121.53(16)

N(1)-C(1)-N(3) 113.22(14)

N(1)-C(1)-C(9) 112.88(14)

N(3)-C(1)-C(9) 112.67(15)

N(1)-C(1)-C(2) 102.07(13)

N(3)-C(1)-C(2) 100.94(12)

C(9)-C(1)-C(2) 114.05(14)

N(4)-C(2)-N(2) 113.42(14)

N(4)-C(2)-C(15) 112.32(14)

N(2)-C(2)-C(15) 112.67(14)

N(4)-C(2)-C(1) 102.00(13)

N(2)-C(2)-C(1) 101.09(13)

C(15)-C(2)-C(1) 114.42(13)

C(14)-C(9)-C(10) 119.08(18)

C(14)-C(9)-C(1) 120.51(18)

C(10)-C(9)-C(1) 120.00(16)

C(4)-N(2)-C(2) 112.64(15)

C(4)-N(2)-C(5) 121.93(19)

C(2)-N(2)-C(5) 124.48(18)

O(2)-C(7)-N(3) 125.74(18)

O(2)-C(7)-N(4) 125.38(18)

N(3)-C(7)-N(4) 108.87(15)

C(19)-C(20)-C(15) 120.66(19)

O(1)-C(4)-N(2) 126.0(2)

O(1)-C(4)-N(1) 125.0(2)

N(2)-C(4)-N(1) 109.00(16)

C(11)-C(10)-C(9) 120.5(2)

C(17)-C(16)-C(15) 120.64(19)

C(16)-C(17)-C(18) 120.8(2)

C(9)-C(14)-C(13) 120.0(2)

C(19)-C(18)-C(17) 119.5(2)

C(18)-C(19)-C(20) 120.2(2)

C(13)-C(12)-C(11) 120.3(2)

C(12)-C(11)-C(10) 120.0(3)

C(12)-C(13)-C(14) 120.2(2)

_____________________________________________________________

Symmetry transformations used to generate equivalent atoms:

Table 4. Anisotropic displacement parameters (Å2x 103) for um316s. The anisotropic

displacement factor exponent takes the form: -22[ h2 a*2U11 + ... + 2 h k a* b* U12 ]

______________________________________________________________________________

U11 U22 U33 U23 U13 U12

______________________________________________________________________________

N(4) 48(1) 53(1) 44(1) 7(1) -8(1) -4(1)

O(2) 62(1) 58(1) 70(1) -4(1) -4(1) -14(1)

N(3) 47(1) 47(1) 54(1) 13(1) 1(1) 1(1)

N(1) 50(1) 75(1) 41(1) -8(1) 3(1) 23(1)

C(15) 41(1) 39(1) 45(1) 8(1) 1(1) 10(1)

C(1) 37(1) 45(1) 41(1) 2(1) 2(1) 9(1)

C(2) 37(1) 39(1) 45(1) 3(1) 0(1) 8(1)

C(9) 45(1) 56(1) 44(1) 14(1) 9(1) 19(1)

N(2) 48(1) 54(1) 74(1) 9(1) 10(1) 24(1)

C(7) 44(1) 47(1) 48(1) 0(1) 3(1) 2(1)

O(1) 70(1) 88(1) 113(1) -35(1) 17(1) 34(1)

C(20) 61(1) 48(1) 56(1) 4(1) 13(1) 10(1)

C(4) 38(1) 56(1) 77(2) -15(1) 4(1) 11(1)

C(10) 41(1) 77(1) 61(1) 17(1) -1(1) 14(1)

C(16) 51(1) 42(1) 69(1) 2(1) 6(1) 7(1)

C(17) 55(1) 46(1) 90(2) 11(1) 6(1) 0(1)

C(14) 79(2) 70(1) 60(1) 17(1) 14(1) 40(1)

C(18) 52(1) 63(1) 93(2) 27(1) 19(1) 9(1)

C(19) 73(2) 71(2) 76(2) 15(1) 34(1) 24(1)

C(6) 80(2) 64(1) 82(2) 32(1) 7(1) 5(1)

C(8) 82(2) 96(2) 63(2) 23(1) -26(1) -9(1)

C(12) 68(2) 148(3) 109(2) 61(2) 30(2) 61(2)

C(11) 46(1) 115(2) 91(2) 37(2) 5(1) 25(1)

C(13) 107(2) 107(2) 84(2) 34(2) 35(2) 75(2)

C(5) 100(2) 90(2) 137(3) 35(2) 9(2) 61(2)

C(3) 90(2) 121(2) 45(1) -3(1) 12(1) 22(2)

______________________________________________________________________________

Table 5. Hydrogen coordinates ( x 104) and isotropic displacement parameters (Å2x 10 3)

for um316s.

________________________________________________________________________________

x y z U(eq)

________________________________________________________________________________

H(20A) 5445 1622 5561 69

H(10A) 6705 3328 9150 72

H(16A) 5754 5399 7649 68

H(17A) 8271 6684 7087 81

H(14A) 4946 -792 7248 78

H(18A) 9371 5483 5764 84

H(19A) 7976 2934 5012 87

H(6A) 1201 -2024 8205 117

H(6B) 1803 -754 9208 117

H(6C) 2983 -1554 8664 117

H(8A) 1488 418 4974 133

H(8B) 3014 1915 4933 133

H(8C) 1469 2093 5463 133

H(12A) 9634 926 8171 118

H(11A) 9240 3090 9126 99

H(13A) 7509 -999 7220 105

H(5A) 1849 5138 7526 150

H(5B) 1593 3961 6476 150

H(5C) 3256 5302 6751 150

H(3A) 3496 3118 10550 134

H(3B) 4745 2231 10305 134

H(3C) 2893 1287 10188 134

________________________________________________________________________________

Table 6. Torsion angles [°] for um316s.

________________________________________________________________

C(4)-N(1)-C(1)-N(3) -91.21(19)

C(3)-N(1)-C(1)-N(3) 72.0(2)

C(4)-N(1)-C(1)-C(9) 139.28(17)

C(3)-N(1)-C(1)-C(9) -57.5(3)

C(4)-N(1)-C(1)-C(2) 16.42(19)

C(3)-N(1)-C(1)-C(2) 179.63(19)

C(7)-N(3)-C(1)-N(1) 121.37(17)

C(6)-N(3)-C(1)-N(1) -65.9(2)

C(7)-N(3)-C(1)-C(9) -109.01(17)

C(6)-N(3)-C(1)-C(9) 63.7(2)

C(7)-N(3)-C(1)-C(2) 13.03(18)

C(6)-N(3)-C(1)-C(2) -174.21(19)

C(7)-N(4)-C(2)-N(2) -89.48(19)

C(8)-N(4)-C(2)-N(2) 68.6(2)

C(7)-N(4)-C(2)-C(15) 141.33(16)

C(8)-N(4)-C(2)-C(15) -60.6(2)

C(7)-N(4)-C(2)-C(1) 18.37(19)

C(8)-N(4)-C(2)-C(1) 176.49(19)

C(16)-C(15)-C(2)-N(4) 158.71(17)

C(20)-C(15)-C(2)-N(4) -27.4(2)

C(16)-C(15)-C(2)-N(2) 29.1(2)

C(20)-C(15)-C(2)-N(2) -156.99(16)

C(16)-C(15)-C(2)-C(1) -85.6(2)

C(20)-C(15)-C(2)-C(1) 88.3(2)

N(1)-C(1)-C(2)-N(4) -134.71(14)

N(3)-C(1)-C(2)-N(4) -17.83(16)

C(9)-C(1)-C(2)-N(4) 103.24(16)

N(1)-C(1)-C(2)-N(2) -17.59(15)

N(3)-C(1)-C(2)-N(2) 99.28(14)

C(9)-C(1)-C(2)-N(2) -139.65(15)

N(1)-C(1)-C(2)-C(15) 103.77(15)

N(3)-C(1)-C(2)-C(15) -139.36(14)

C(9)-C(1)-C(2)-C(15) -18.29(19)

N(1)-C(1)-C(9)-C(14) 158.72(18)

N(3)-C(1)-C(9)-C(14) 28.9(2)

C(2)-C(1)-C(9)-C(14) -85.4(2)

N(1)-C(1)-C(9)-C(10) -28.6(2)

N(3)-C(1)-C(9)-C(10) -158.43(16)

C(2)-C(1)-C(9)-C(10) 87.3(2)

N(4)-C(2)-N(2)-C(4) 122.82(17)

C(15)-C(2)-N(2)-C(4) -108.17(17)

C(1)-C(2)-N(2)-C(4) 14.41(19)

N(4)-C(2)-N(2)-C(5) -68.2(3)

C(15)-C(2)-N(2)-C(5) 60.8(2)

C(1)-C(2)-N(2)-C(5) -176.6(2)

C(1)-N(3)-C(7)-O(2) 176.16(18)

C(6)-N(3)-C(7)-O(2) 3.2(3)

C(1)-N(3)-C(7)-N(4) -2.4(2)

C(6)-N(3)-C(7)-N(4) -175.39(19)

C(2)-N(4)-C(7)-O(2) 170.31(18)

C(8)-N(4)-C(7)-O(2) 11.5(3)

C(2)-N(4)-C(7)-N(3) -11.1(2)

C(8)-N(4)-C(7)-N(3) -169.97(19)

C(16)-C(15)-C(20)-C(19) 0.4(3)

C(2)-C(15)-C(20)-C(19) -173.64(18)

C(2)-N(2)-C(4)-O(1) 174.03(19)

C(5)-N(2)-C(4)-O(1) 4.7(3)

C(2)-N(2)-C(4)-N(1) -5.0(2)

C(5)-N(2)-C(4)-N(1) -174.3(2)

C(1)-N(1)-C(4)-O(1) 172.62(19)

C(3)-N(1)-C(4)-O(1) 8.6(3)

C(1)-N(1)-C(4)-N(2) -8.3(2)

C(3)-N(1)-C(4)-N(2) -172.31(19)

C(14)-C(9)-C(10)-C(11) 0.2(3)

C(1)-C(9)-C(10)-C(11) -172.55(19)

C(20)-C(15)-C(16)-C(17) -0.3(3)

C(2)-C(15)-C(16)-C(17) 173.78(18)

C(15)-C(16)-C(17)-C(18) 0.5(3)

C(10)-C(9)-C(14)-C(13) -0.5(3)

C(1)-C(9)-C(14)-C(13) 172.2(2)

C(16)-C(17)-C(18)-C(19) -0.7(4)

C(17)-C(18)-C(19)-C(20) 0.8(4)

C(15)-C(20)-C(19)-C(18) -0.6(4)

C(13)-C(12)-C(11)-C(10) 0.3(4)

C(9)-C(10)-C(11)-C(12) -0.1(4)

C(11)-C(12)-C(13)-C(14) -0.6(4)

C(9)-C(14)-C(13)-C(12) 0.8(4)

________________________________________________________________

Symmetry transformations used to generate equivalent atoms:
